1 **Factors that affect enrollment into a community-based**  
2 **health insurance scheme among households in Arba**  
3 **Minch Zuria District, Gamo Zone, Southern Ethiopia,**  
4 **2023: A community-based unmatched case-control Study**

5 **Silas Bukuno Bujitie<sup>1</sup>, Yusuf Haji daud<sup>2</sup>**

6 <sup>1</sup>Ethiopian Field Epidemiology and Laboratory Training Program, School of Public Health,  
7 Hawassa University, Hawassa, Ethiopia; <sup>2</sup>College of Medicine and Health Science, School of  
8 Public Health, Hawassa University, Hawassa, Ethiopia.

9

10 Author's E-mail Address

11 Silas Bukuno (SB):bukunosilas@yahoo.com

12 Yusuf Haji (YH):yusufhaji438@gmail.com

13 Corresponding Author Address: Silas Bukuno

14 E-mail:bukunosilas@yahoo.com

15

16

17

18

19

20

21

22

**NOTE: This preprint reports new research that has not been certified by peer review and should not be used to guide clinical practice.**

## 23 *Abstract*

24 **Background:** Many low-and middle-income countries are affected by catastrophic health  
25 expenditures as out-of-pocket payments exceed the World Health Organization's (WHO)  
26 10% threshold level. The government of Ethiopia has been working to reduce out-of-pocket  
27 payments from 37% to less than 15% in its health sector transformation plan II; however, the  
28 scheme was marked by a low membership and dropout rate. The aim of the study was to  
29 identify determinants of enrolment into a community-based health insurance scheme  
30 (CBHIS) in Arba Minch Zuria District of Gamo Zone, Southern Ethiopia.

31 **Methods:** Unmatched case-control study was employed from February 8, 2023, to March 9,  
32 2023, among 327 participants (109 cases and 218 controls to community-based health  
33 insurance (CBHI) scheme) in a 1:2 proportions. Multi-stage sampling technique was used to  
34 draw the study participants. Data were collected by using structured interviewer administered  
35 questionnaire and then entered into Epi-data and exported to SPSS for analysis. Bivariable  
36 and multivariable analysis was carried out using binary logistic regression. Significance was  
37 declared by using an adjusted odds ratio (AOR) with 95% confidence interval (CIs) and a p  
38 value of <0.05.

39 **Results:** A total of 327 participants (109 enrolled and 218 non-enrolled) were interviewed,  
40 resulting in a response rate of 100%. Family size (AOR=1.66; 95% CI: 1.00–2.73), wealth  
41 index (AOR=2.29; 95% CI: 1.25–4.19), awareness level of the community based health  
42 insurance scheme (AOR=3.78; 95% CI: 1.09–13.18), and perceived quality of health care  
43 (AOR=1.67; 95% CI: 1.02-2.75) were found to be determinant factors of enrollment in the  
44 scheme.

45 **Conclusion:** Strengthening community awareness activities, focusing on families of poor  
46 households, and improving the quality of health service delivery are highly recommended to  
47 improve enrollment in the scheme.

48 **Keywords:** health insurance, case-control, Arbaminch Zuria, South Ethiopia

## 49 *Introduction*

50 Community-Based Health Insurance (CBHI) is an instrument that increases access to quality  
51 healthcare for communities working in the informal sector and offers financial protection  
52 against the cost of disease. The other type of health insurance is social health insurance  
53 (SHI), which includes people who work in the formal economy[1]. The 2030 Sustainable  
54 Development Goals (SDGs) place a premium on ensuring that all people have access to high-  
55 quality healthcare without financial burden[2]. Access to adequate health services is a  
56 prerequisite for people to achieve good health and lead a healthy lifestyle[3]. Universal  
57 Health Coverage (UHC) ensures that all individuals and communities have access to high-  
58 quality health care without financial burden. Every year, catastrophic health expenses push  
59 hundreds of millions of people into poverty in low-and middle-income countries (LMICs)[4].  
60 Many LMICs faced challenges in raising adequate funds to finance health care for their  
61 citizens[5]. Thus, they are encouraging risk-pooling institutions, like CBHI, to finance  
62 healthcare out-of-pocket payments (OOPs)[6].

63 CBHI is a community-based strategy administered by the government or a private, for-profit  
64 organization that provides insurance services to cover the cost of health care[7]. Since the  
65 1990s, many LMICs use it as a strategy to avert OOPs for purchasing health services[8]. The  
66 CHBI scheme is a risk-pooling approach that shares the financial burden among households  
67 with varying health statuses to make it more accessible[9]. Globally, over 150 million people  
68 face financial hardship because of healthcare expenditures; as a result, the number of  
69 households in deep poverty increases by about 25 million households each year[10]. The  
70 2005 WHO assembly achieved UHC by implementing health insurance programs and  
71 reducing direct payments out of pocket. Global healthcare spending is less than 12% of total  
72 Gross Domestic Product (GDP)[4, 11].

73 Globally, over 800 million people spend 10% of their income on health care through direct  
74 payment, potentially increasing the number of people entering poverty each year[12].  
75 Because of limited resources, many African households fund their healthcare costs by selling  
76 personal property[13]. More than half of Sub-Saharan countries have higher direct healthcare  
77 spending, which is greater than 30% of total income[14]. 42% demonstrated this in  
78 Kenya[15] and 37% in Ethiopia[16]. The high amount of direct payments for health care in  
79 Ethiopia hinders access to health services[17]. The Ethiopian government spends less than  
80 5% of its GDP on health, which is less than the requirement set by the Alma Ata Declaration,  
81 which is 15%[18]. The Ethiopian government aims to reduce OOPs to less than 15% in  
82 Transformation Plan II[19]. Community-based health insurance is an alternative approach for  
83 countries such as Ethiopia that cannot directly cover the costs of medical care for the poor[20,  
84 21]. Thus, Ethiopia launched a pilot CBHI scheme in June 2011 in 13 different districts of  
85 Amhara, Oromia, SNNPR, and Tigray regional states[22], with the future intent to cover  
86 83.6% of the population of Ethiopia who are engaged in informal sectors, mostly rural  
87 residents[23]. According to the Ethiopian Health Insurance Agency's (EHIA) CBHI report, it  
88 has reached 50%; however, the 2020 target was to achieve 80% coverage[24]. This number  
89 decreases to 42% in the study district, with varying performance across its kebeles in  
90 2021/2022[25]. Although it has shown progress since its inception, the scheme has been  
91 marked by low membership and a high dropout rate from the program once members have  
92 joined[6, 26]. Low membership is associated with low enrollment at the outset or a high  
93 dropout rate after joining the scheme[27]. There was no study that documented the  
94 determinants of enrollment in CBHI in Gamo Zone in general and Arba Minch Zuria district  
95 in particular. This study aimed to figure out the determinants of enrollment in the CBHI  
96 scheme in the Arba Minch Zuria District.

97

## 98 *Materials and Methods*

### 99 *Study Setting and Period*

100 The study was conducted from February 8, 2023, to March 9, 2023, in the Arba Minch Zuria  
101 District of Gamo Zone, Southern Ethiopia. Arba Minch town is the administrative town of the  
102 district, which is located 275 km from the regional capital Hawassa and 505 km from Addis  
103 Ababa (the country's capital). Arba Minch Zuria District is one of the 20 districts of Gamo  
104 Zone. Administratively, the district is divided into one urban and 18 rural kebeles. According  
105 to the 2007 national census projection, the estimated total population of the district was  
106 129,665, in 2022, of which 49 percent were male. The district has 26 health centers and 4  
107 health posts, which are under the government, and 32 clinics owned by the private sector.  
108 Primary health care coverage in the district was 80%. According to the district CBHI scheme  
109 department, there were about 26,462 households in the district, of which 23,552 (89%) were  
110 eligible for the CBHI scheme. The rest, 11%, were expected to be engaged in the formal  
111 sector. According to the department's 2021–2022 annual report, 9,891 (42% of eligible)  
112 households were enrolled in the scheme. Among enrolled households, 2,410 (24%) were  
113 needy[25]. Fig 1 shows administrative map of the study area.

114 **Fig 1:** (As indicated in fig 1, *A*-represents the Ethiopian boundary, *B*-represents the South  
115 Nation Nationalities and Peoples' (SNNP) Regional State, *C*-represents the Gamo Zone, and  
116 *D*-represents the administrative map of Arba Minch Zuria District)

117

118

119

120

121

122 ***Study Design***

123 An unmatched community-based case-control study was used.

124 ***Populations***

125 **Source population:** all households that resided in Arba Minch Zuria District during data  
126 collection were source populations.

127 **Study population:** all randomly selected households in selected kebeles of the district were  
128 considered as a study population.

129 ***Eligibility criteria***

130 ***Case***

131 **Inclusion criteria:** residents who lived in selected kebeles for at least six months and were  
132 formally registered for the scheme for the years 2021-2022 during data collection were  
133 included in the study.

134 **Exclusion criteria:** household heads who worked in the formal sector or had health  
135 insurance through another scheme and were unable to communicate (critically sick) during  
136 data collection were excluded from the study.

137 ***Control***

138 **Inclusion criteria:** non-enrolled households that lived for at least six months in the selected  
139 kebeles of the district during the study period were included in the study.

140 **Exclusion Criteria:** non-enrolled household heads in any form of insurance scheme who  
141 were unable to communicate (Critically ill) during the study period were excluded from the  
142 study.

143

144

145

## 146 *Sample size determination and sampling procedure*

### 147 *Sample size determination*

148 The double population proportion assumption formula was used to calculate the sample size  
149 using Epi-Info software version 7. The following parameters were considered: a precision of  
150 5% at a 95% confidence level and a power of 80%. The ratio of controls to cases ( $r$ ) = 2, OR  
151 = 2.79,  $P_1$  = 29.5%, and  $P_2$  = 17.2% [28]. In addition, a 10% possible non-response rate was  
152 multiplied by the design effect of 1.5. Finally, a sample size of 327 (109 cases and 218  
153 controls) was obtained.

### 154 *Sampling procedure*

155 A multi-stage sampling technique was used to select samples. In the first phase, six kebeles  
156 were selected by simple random sampling (the lottery method) from a pool of 19 kebeles,  
157 considering their representativeness. In the later stage, we used the same technique to select  
158 households from six selected kebeles. A list of households in the selected kebeles was  
159 collected from the health posts. The sample size for selected kebeles was determined by the  
160 number of households in each kebele (Proportional allocation). Figure 2 illustrates a  
161 diagrammatic presentation of the sampling procedure.

162 **Fig 2:-Schematic presentation of sampling procedure, Arba Minch Zuria District, Gamo**  
163 *Zone, Southern Ethiopia, 2023*

164

165

166

167

168

169

170

171 ***Study variables***

172 ***Dependent variable***

173 CBHI enrollment status

174 ***Independent variables***

175 The independent predictors were classified as socio-demographic factors (age, sex, marital  
176 status of household heads, household size, educational level, occupational status, and family  
177 wealth index), individual-related factors (awareness level of CBHI, perception towards  
178 CBHI, and perceived quality of health services), household-related factors (chronic or recent  
179 illness in the household and elderly people in the household), facility-related factors  
180 (accessibility of health facilities and availability of health services), and scheme-related  
181 factors (premium affordability and benefits package)

182 ***Operational definitions***

183 ***Wealth index:*** this variable was evaluated using 30 household assets: live stocks,  
184 household infrastructure (electricity, bicycle, electric bakery, bed, mattress, and stove),  
185 latrine, water source, housing condition (floor, wall, roof, window, kitchen, separate cattle  
186 room), and size of agricultural land. After dichotomizing all thirty variables into yes/no or  
187 improved/unimproved categories, principal component analysis was used to reduce the  
188 dimensionality of large data sets. Finally, the wealth index was categorized as poor, medium,  
189 and rich for analysis in SPSS.

190 ***Awareness about the CBHI scheme:*** participants' awareness of CBHI was assessed  
191 using five questions that comprised its existence, its principles, and the significance of  
192 community-based health insurance. Participants who correctly responded to this question  
193 were classified as "correct responses, while those who did not were classified as "incorrect  
194 responses." Each item has an equal value. Thus, the correct response scored 1, and the wrong



195 response scored 0. Finally, the aggregate score for all awareness questions ranges from 0 to 5  
196 points. Participants' overall awareness was categorized as good if the scores were 3 and  
197 above ( $\geq 60\%$ ) and otherwise poor.

198 ***Perception towards the CBHI:*** this is how people perceive the CBHI's benefits package  
199 adequacy, service quality; trust in the management body, and patient handling by health  
200 professionals. This is measured via five-point Likert scale questionnaires ranging from  
201 "strongly disagree" to "strongly agree," which are used for respondents to express their  
202 opinions on four perception tools. To measure this variable, first, we computed the median of  
203 the individual sample, then the sample median score was calculated and graded as positive  
204 perception (for values above the median score) and negative perception (for values less than  
205 the median score). The Cronbach's alpha result for this variable was 0.91.

206 ***Perceived healthcare quality:*** this was the extent of the respondent's view on the quality  
207 of healthcare delivery. This includes the health worker's perspective, the availability of drugs  
208 and supplies, including diagnostics, the waiting time, and the cleanliness of the facility. This  
209 is measured via five-point Likert scale questionnaires ranging from "strongly disagree" to  
210 "strongly agree," which are used for respondents to express their opinions on five perception  
211 tools. To measure this variable, first, we computed the median of the individual sample, then  
212 the sample median score was calculated and graded as good quality (for values above the  
213 median score) and poor quality (for values less than the median score). The Cronbach's alpha  
214 result for this variable was 0.79.

215 ***Affordability of premium:*** affordability was used in this research to assess the perception  
216 of household heads on premium affordability (375 ETBR per year): whether it is low,  
217 medium, or expensive.

218 ***Chronic illness:*** a disease condition that lasts over 3 months.

## 219 ***Data collection tools and techniques***

220 We used a structured questionnaire adapted from the Ethiopian Demographic and Health  
221 Survey (EDHS) to collect data[29]. Originally, the questionnaire was prepared in English,  
222 and it was also restated into Amharic and back to English by a language expert to ensure  
223 consistency. The questionnaire contains socio-demographic characteristics, individual-related  
224 factors, household-related factors, facility-related factors, and scheme-related factors. Three  
225 BSc nurses and two public health officers were involved in data collection and supervision  
226 independently. They were trained for one day to become familiar with data collection tools.  
227 Health professionals were named based on their previous experience in data collection.  
228 Supervisors check the completeness and clarity daily and send a report for data entry.

## 229 ***Data quality management***

230 One-day training was given for each data collector and supervisor, focusing especially on the  
231 privacy and confidentiality of the study participants. Supervisors check the data daily for  
232 completeness and accuracy before data entry. The data collection tool was pre-tested at 5% of  
233 the sample size in the non-selected kebele of the study district.

## 234 ***Data processing and analysis***

235 The data were cleaned and edited after being entered into Epi-data version 4.6.0.6 and  
236 exported to Statistical Package for the Social Sciences (SPSS) version 27 for analysis. All  
237 categorical variables were cross-tabulated with response variables and presented using  
238 frequency, proportions, and tables for case and control groups. All explanatory variables that  
239 were significantly associated with the response variable in the bivariable logistic regression  
240 analysis at  $p < 0.25$  were entered into the multivariable logistic regression analysis using the  
241 backward elimination stepwise method to identify independent predictors in the CBHI  
242 enrollment. The model's acceptability was checked using the Hosmer and Lemeshow

243 goodness-of-fit test and the Omnibus test. Adjusted odds ratios (AORs) with their  
244 corresponding 95% confidence intervals (CIs) were used to claim the significance of  
245 predictor variables at a P-value of 0.05.

### 246 *Ethical considerations*

247 Ethical clearance was obtained from the institutional ethics review board (IRB) of Hawassa  
248 University under the reference number IRB/105/14 and the study was conducted in  
249 accordance with Declaration of Helsinki for human subjects. Written informed consent was  
250 also obtained from participants before data collection. They were informed that participation  
251 will be voluntary. The right to withdraw from the study during the interview was assured. No  
252 personal identifiers were used in the data collection tool. No data were accessed by a third  
253 party except the principal investigator and were confidential.

## 254 *Results*

### 255 *Socio-demographic characteristics*

256 All three hundred twenty-seven participants (109 CBHI users and 218 non-CBHI users) got  
257 interviewed, resulting in an overall response rate of 100%. Most cases (79%) and controls  
258 (80%) were male. The mean age of cases and controls was 38.9 years (SD=+ 10.2), and 39.4  
259 years (SD=±11). Nearly forty-six percent (45.9%) of participants were found under the age  
260 category of 36–54 years for both cases and controls. Regarding marriage, 92.7% of cases and  
261 89% of controls were married. Nearly 47% of cases and 59% of controls were farmers ([Table](#)  
262 [1](#)). The Bivariable logistic regression analysis of CBHI-program related variables were also  
263 described in ([Table 2](#)).

**Table 1:-** Bivariable logistic regression analysis of socio-demographic variables for CBHI enrolment in Arbaminch Zuria District, Gamo Zone, Southern Ethiopia, 2023

| Explanatory Variables |                     | CBHI Enrollment Status |                    | COR  | 95% CI |       | P-value |
|-----------------------|---------------------|------------------------|--------------------|------|--------|-------|---------|
|                       |                     | Enrolled (N/%)         | Not Enrolled (N/%) |      | Lower  | Upper |         |
| Age                   | 18-35               | 45(32.8)               | 92(67.2)           | 1    |        |       |         |
|                       | 36-54               | 50(33.3)               | 100(66.7)          | 0.98 | 0.59   | 1.60  | 0.930   |
|                       | ≥55                 | 14(35)                 | 26(65)             | 0.91 | 0.43   | 1.91  | 0.799   |
| Sex                   | Male                | 86(33)                 | 175(67)            | 1    |        |       |         |
|                       | Female              | 23(34.8)               | 43(65.2)           | 0.92 | 0.52   | 1.62  | 0.770   |
| Ethnicity             | Gamo                | 79(35.1)               | 146(64.9)          | 0.85 | 0.46   | 1.59  | 0.616   |
|                       | Wolaita             | 12(26.7)               | 33(73.3)           | 1.27 | 0.53   | 3.02  | 0.589   |
|                       | Others <sup>a</sup> | 18(38.3)               | 39(68.4)           | 1    |        |       |         |
| Religion              | Protestant          | 66(32.2)               | 139(67.8)          | 1.81 | 0.58   | 5.58  | 0.305   |
|                       | Orthodox            | 37(33.9)               | 72(66.1)           | 1.67 | 0.52   | 5.32  | 0.387   |
|                       | Others <sup>b</sup> | 6(46.2)                | 7(53.8)            | 1    |        |       |         |
| Marital Status        | Single              | 3(33.3)                | 6(66.7)            | 1    |        |       |         |
|                       | Married             | 101(34.2)              | 194(65.8)          | 0.96 | 0.24   | 3.92  | 0.955   |
|                       | Others <sup>c</sup> | 5(21.7)                | 18(78.3)           | 1.80 | 0.33   | 9.89  | 0.499   |

**Table 1:-** (Continued).

|                                                                                                                                                                                 |                            |          |           |      |      |      |        |
|---------------------------------------------------------------------------------------------------------------------------------------------------------------------------------|----------------------------|----------|-----------|------|------|------|--------|
| <b>Family size</b>                                                                                                                                                              | 1-5                        | 70(40)   | 105(60)   | 1    |      |      |        |
|                                                                                                                                                                                 | >5                         | 39(25.7) | 113(74.3) | 1.93 | 1.20 | 3.10 | 0.006* |
| <b>Educational status</b>                                                                                                                                                       | No education               | 18(34)   | 35(66)    | 1    |      |      |        |
|                                                                                                                                                                                 | Primary (1-8)              | 56(32.7) | 115(67.3) | 1.05 | 0.55 | 2.02 | 0.870  |
|                                                                                                                                                                                 | 2 <sup>nd</sup> ry & above | 35(34)   | 68(66)    | 0.99 | 0.49 | 2.01 | 0.998  |
| <b>Occupation</b>                                                                                                                                                               | Farmer                     | 51(28.5) | 128(71.5) | 2.26 | 1.22 | 4.17 | 0.009* |
|                                                                                                                                                                                 | Merchant                   | 31(34.1) | 60(65.9)  | 1.74 | 0.89 | 3.43 | 0.108  |
|                                                                                                                                                                                 | Daily laborer              | 27(47.4) | 30(52.6)  | 1    |      |      |        |
| <b>Wealth index</b>                                                                                                                                                             | Poor                       | 45(38.1) | 73(61.9)  | 1    |      |      |        |
|                                                                                                                                                                                 | Middle                     | 40(40)   | 60(60)    | 0.93 | 0.54 | 1.59 | 0.779  |
|                                                                                                                                                                                 | Rich                       | 24(22)   | 85(78)    | 2.18 | 1.22 | 3.92 | 0.009* |
| <sup>a</sup> Zayse & Goffa, <sup>b</sup> Muslim & Atheist, <sup>c</sup> Divorced & widowed 1=Reference variable, *Variables significant at p-value 0.25<br>COR-Crude odds ratio |                            |          |           |      |      |      |        |

**Table 2:-Bivariable logistic regression analysis of CBHI-program related variables for enrolment in Arbaminch Zuria District, Gamo Zone, Southern Ethiopia, 2023**

| Explanatory Variables                          | CBHI Enrollment Status |                    | COR  | 95% CI |       | P-value |
|------------------------------------------------|------------------------|--------------------|------|--------|-------|---------|
|                                                | Enrolled (N/%)         | Not Enrolled (N/%) |      | Lower  | Upper |         |
| <b>Presence of elderly people (≥ 60 years)</b> |                        |                    |      |        |       |         |
| Yes                                            | 20(37.7)               | 33(62.3)           | 0.79 | 0.43   | 1.46  | 0.458   |
| No                                             | 89(32.5)               | 185(67.5)          | 1    |        |       |         |
| <b>Presence of chronic patients</b>            |                        |                    |      |        |       |         |
| Yes                                            | 6(30)                  | 14(70)             | 1.18 | 0.44   | 3.15  | 0.744   |
| No                                             | 103(33.6)              | 204(66.4)          | 1    |        |       |         |
| <b>Awareness level of CBHI</b>                 |                        |                    |      |        |       |         |
| Poor awareness                                 | 106(35.6)              | 192(64.4)          | 1    |        |       |         |
| Good awareness                                 | 3(10.3)                | 26(89.7)           | 4.79 | 1.42   | 16.18 | 0.012*  |
| <b>Perception towards CBHI</b>                 |                        |                    |      |        |       |         |
| Negative perception                            | 60(40.3)               | 89(59.7)           | 1    |        |       |         |
| Positive perception                            | 49(27.5)               | 129(72.5)          | 1.78 | 1.12   | 2.82  | 0.015*  |
| <b>Perceived health care quality</b>           |                        |                    |      |        |       |         |
| Poor quality                                   | 61(40.9)               | 88(59.1)           | 1    |        |       |         |
| Good quality                                   | 48(27)                 | 130(73)            | 1.88 | 1.18   | 2.99  | 0.008*  |

**Table 2:-** (Continued).

| Explanatory Variables                                                             |               | CBHI Enrollment Status |                    | COR  | 95% CI |       | P-value |
|-----------------------------------------------------------------------------------|---------------|------------------------|--------------------|------|--------|-------|---------|
|                                                                                   |               | Enrolled (N/%)         | Not Enrolled (N/%) |      | Lower  | Upper |         |
| <b>Premium affordability</b>                                                      | Expensive     | 25(36.8)               | 43(63.2)           | 1    |        |       |         |
|                                                                                   | Medium        | 46(33.8)               | 90(66.2)           | 1.14 | 0.62   | 2.08  | 0.678   |
|                                                                                   | Low           | 38(30.9)               | 85(69.1)           | 1.30 | 0.69   | 2.43  | 0.409   |
| <b>Distance from health facility</b>                                              | <2km          | 42(35.3)               | 77(64.7)           | 0.87 | 0.54   | 1.42  | 0.585   |
|                                                                                   | 2-5km         | 6(31.6)                | 13(68.4)           | 1.03 | 0.37   | 2.85  | 0.951   |
|                                                                                   | >5km          | 61(32.3)               | 128(67.7)          | 1    |        |       |         |
| <b>Availability of diagnostics</b>                                                | Available     | 66(31.6)               | 143(68.4)          | 1.24 | 0.77   | 1.99  | 0.371   |
|                                                                                   | Not available | 43(36.4)               | 75(63.6)           | 1    |        |       |         |
| <b>Prescribed drugs</b>                                                           | Available     | 63(39.9)               | 95(60.1)           | 0.56 | 0.35   | 0.89  | 0.016*  |
|                                                                                   | Not available | 46(27.2)               | 123(72.8)          | 1    |        |       |         |
| <b>Patient's waiting time</b>                                                     | <1 hrs.       | 27(32.9)               | 55(67.1)           | 0.91 | 0.51   | 1.64  | 0.753   |
|                                                                                   | 1-2 hrs.      | 40(36.7)               | 69(63.3)           | 0.77 | 0.45   | 1.31  | 0.338   |
|                                                                                   | >2 hrs.       | 42(30.9)               | 94(69.1)           | 1    |        |       |         |
| 1=Reference variable, *Variables significant at p-value 0.25 COR-Crude odds ratio |               |                        |                    |      |        |       |         |

## 264 ***Determinant factors for CBHI enrolment***

265 Among twenty variables, family size, respondent's occupation, household wealth, awareness  
266 level of CBHI, perception towards CBHI, perceived health care quality, and availability of  
267 prescribed drugs in the contractual facility were significant at a p-value of  $<0.25$  with a 95%  
268 CI. The above seven candidate variables were further fitted in the multivariable analysis  
269 using the backward likelihood ratio (LR) to control confounders and determine the effect of  
270 all predictor variables on the likelihood of CBHI enrollment. In the final multivariable  
271 analysis, the impact of determinant factors on household heads' decision to enroll in the  
272 CBHI scheme was assessed. Hence, the multivariable analysis showed households with a  
273 family size of over 5 were 1.66 times (AOR = 1.66; 95% CI: 1.01–2.73) more likely to be  
274 enrolled in the CBHI scheme compared to a smaller family size. Households with the highest  
275 wealth index (rich) were 2.29 times (AOR = 2.29; 95% CI: 1.25–4.19) more likely to be  
276 enrolled in the CBHI scheme compared to their counterparts (poor). Household heads who  
277 perceived the quality of health care as good were 1.67 times (AOR = 1.67; 95% CI: 1.02-  
278 2.75) more likely to enroll in the CBHI scheme than those households who perceived it as  
279 poor (Table 3). Finally, the odds of CBHI enrollment were 3.78 times higher among  
280 respondents with good awareness (AOR = 3.78; 95% CI: 1.09–13.18) compared to those with  
281 a poor awareness level.

282



**Table 3:- Determinant factors in multivariable logistic regression analysis for CBHI enrollment in Arba Minch Zuria District, Gamo Zone, Southern Ethiopia, 2023**

| Explanatory Variables                                       |                     | CBHI Enrollment Status |                    | COR (95% CI)     | AOR (95% CI)     | P-value |
|-------------------------------------------------------------|---------------------|------------------------|--------------------|------------------|------------------|---------|
|                                                             |                     | Enrolled (N/%)         | Not Enrolled (N/%) |                  |                  |         |
| Family size                                                 | 1-5                 | 70(40)                 | 105(60)            | 1                | 1                |         |
|                                                             | >5                  | 39(25.7)               | 113(74.3)          | 1.93(1.20-3.10)  | 1.66(1.01-2.73)  | 0.047   |
| Occupation                                                  | Farmer              | 51(28.5)               | 128(71.5)          | 2.26(1.22-4.17)  |                  |         |
|                                                             | Merchant            | 31(34.1)               | 60(65.9)           | 1.74(0.89-3.43)  |                  |         |
|                                                             | Daily laborer       | 27(47.4)               | 30(52.6)           | 1                |                  |         |
| Wealth index                                                | Poor                | 45(38.1)               | 73(61.9)           | 1                | 1                |         |
|                                                             | Middle              | 40(40)                 | 60(60)             | 0.93(0.54-1.59)  | 0.90(0.51-1.59)  |         |
|                                                             | Rich                | 24(22)                 | 85(78)             | 2.18(1.22-3.92)  | 2.29(1.25-4.19)  | 0.007   |
| Awareness level of CBHI                                     | Poor awareness      | 106(35.6)              | 192(64.4)          | 1                | 1                |         |
|                                                             | Good awareness      | 3(10.3)                | 26(89.7)           | 4.79(1.42-16.18) | 3.78(1.09-13.18) | 0.037   |
| Perception towards CBHI                                     | Negative perception | 60(40.3)               | 89(59.7)           | 1                |                  |         |
|                                                             | Positive perception | 49(27.5)               | 129(72.5)          | 1.78(1.12-2.82)  |                  |         |
| Perceived health care quality                               | Poor quality        | 61(40.9)               | 88(59.1)           | 1                | 1                |         |
|                                                             | Good quality        | 48(27)                 | 130(73)            | 1.88 (1.18-2.99) | 1.67(1.02-2.75)  | 0.041   |
| Prescribed drugs                                            | Available           | 63(39.9)               | 95(60.1)           | 0.56(0.35-0.89)  |                  |         |
|                                                             | Not available       | 46(27.2)               | 123(72.8)          | 1                |                  |         |
| 1=Reference variable COR-Crude odds ratio AOR-Adjusted odds |                     |                        |                    |                  |                  |         |

## 283 *Discussions*

284 This research was conducted to identify determinants of the enrollment of households in the  
285 CBHI in the Arbaminch Zuria District. Accordingly, the size of the family in the household,  
286 the wealth index of the household, the level of awareness of the CBHI and the perceived  
287 quality of health care by the household were found to be independent predictors of enrolment  
288 in the CBHI scheme.

289 Our study revealed that households with a larger family size were more likely to enroll in the  
290 CBHI scheme than their counterparts. This finding was supported by studies conducted in  
291 Ethiopia and Nigeria[30, 31]. The main reason for this could be because the likelihood of  
292 having health problems in a family depends on household size. As a result, the likelihood of  
293 at least one family member falling ill rises with family size[32]. Therefore, large families  
294 have a greater tendency to prefer risk pooling institutions to cover their regular health  
295 expenses rather than paying out of pocket[33]. The other reason might be due to the fact that  
296 households with a small family size may have a better income and can afford the cost of  
297 medical care in better private health facilities[34].

298 On the contrary, the studies conducted in Burkina Faso[35-37] stands in opposition to our  
299 study findings. The possible justification for this might be amount of premium contribution  
300 paid by households for membership in an insurance package. In Burkina Faso, the  
301 membership contribution for CBHI scheme was estimated per individuals in household,  
302 which demands large amount of money for households with large family members. This  
303 system might discourage households with large size, as it creates financial burden on the  
304 families. Whereas in Ethiopia, the premium contribution was fixed per household level (flat  
305 rate), regardless of family size[38]. Another factor that determined the enrollment of  
306 households in to CBHI was economic status.

307 In addition, our study found that households classified as rich by asset category using  
308 principal component analysis were twice as likely to enrol in the CBHI programme as those  
309 in the poor category. This study's findings were consistent with a study conducted in Burkina  
310 Faso, where enrolment in the CBHI programme is higher among people with higher  
311 socioeconomic status[39].

312 Similar studies in Ethiopia, Nigeria, and India found that wealthier households (the richest  
313 quintile) were more likely to enlist in the CBHI scheme than their counterparts[1, 38, 40].

314 The possible justification for this similarity might be households in the rich category were  
315 able to make payment than poor households and there may also be differences in the access to  
316 media in the study area. Studies in Uganda and Burkina Faso showed that the primary reason  
317 for not-enrolled households were financial problem[39, 41]. Previous research in southwest,  
318 western, and southern Ethiopia contradicts our findings that impoverished household heads  
319 were more likely to enlist in the CBHI scheme than rich household heads [30, 38, 42]. The  
320 justification for this discrepancy might be due to differences in socioeconomic status and  
321 health insurance experiences.

322 Furthermore, enrolment in the CBHI programme is determined by perceptions of health-care  
323 quality. Household heads who perceived the health care as of good quality were 1.67 times  
324 more likely to enroll in the CBHI scheme than those who perceived it negatively. A similar  
325 case-control study conducted in Gida Ayana District, east Wollega Zone, western Ethiopia,  
326 confirmed that respondents who perceived high quality of care were found to be 8.37 times  
327 more likely to enroll in the CBHI scheme membership compared to those who perceived low  
328 quality of care[31]. Another empirical study conducted in Burkina Faso, south Ethiopia and  
329 northwest Ethiopia showed consistent evidence with our study findings [36, 42, 43]. This  
330 may be justified by the fact that good-quality health services may attract more people. Similar

331 logic works for the CBHI program: the higher society's perception of the quality of health  
332 services, the more people will enroll in the scheme.

333 Finally, the current study revealed that respondents who had a good awareness level of the  
334 CBHI scheme were nearly four times more likely to be enrolled in CBHI compared to those  
335 with a poor awareness level. The finding is consistent with a study conducted in Ethiopia[31],  
336 where those respondents who had a good awareness level of CBHI scheme membership were  
337 3.78 times more likely to be enrolled in CBHI compared to those with a poor awareness level.  
338 Another study conducted in Ethiopia, Bangladesh, and India supported our findings,  
339 suggesting that household heads with a good level of awareness of the CBHI scheme were  
340 more likely to join the program than their counterparts[44-46]. The possible justification may  
341 be due to the fact that people with better information and understanding of CBHI's existence,  
342 principles, and importance are more likely to join the scheme. This implies that raising  
343 community awareness may help implementation by improving enrollment in the scheme.

### 344 ***Limitation of the study***

345 As recall bias was common during the case-control study, however, it was minimised by  
346 shortening the time to less than 3 months.

### 347 ***Conclusion***

348 Households with large family sizes, a high wealth index, a high level of awareness of the  
349 CBHI, and perceived quality of health care were found to be independent predictors of  
350 enrollment in the study area. Strengthening CBHI awareness activities, focusing on families  
351 of poor households, and improving the quality of health service delivery are highly  
352 recommended. Finally, to explore other determinants of enrollment in the scheme,  
353 researchers should consider mixed-methods research, which may cover a broader geographic  
354 area.

355

## 356 *Acknowledgements*

357 First and foremost, I would like to thank God Almighty for providing me with the strength,  
358 knowledge, talent, guidance, and opportunity to complete my studies successfully. Next, I  
359 would like to thank the Ethiopian Field Epidemiology and Laboratory Training Programme  
360 and Hawassa University for creating an opportunity to study field epidemiology.

361 Furthermore, I would like to convey my heartfelt appreciation to my principal adviser, Mr.  
362 Yusuf Haji, for his unwavering support and insightful suggestions in the preparation of this  
363 thesis. My appreciation also extends to my beloved spouse for encouraging me throughout  
364 my study period through prayer. Finally, my thanks go to the data collectors and study  
365 participants, without whom this finding would not have been possible.

## 366 *Abbreviations and acronyms*

|     |              |                                                  |
|-----|--------------|--------------------------------------------------|
| 367 | <b>CBHI</b>  | Community Based Health Insurance                 |
| 368 | <b>EDHS</b>  | Ethiopian Demographic and Health Survey          |
| 369 | <b>EHIA</b>  | Ethiopian Health Insurance Agency                |
| 370 | <b>GDP</b>   | Gross Domestic Product                           |
| 371 | <b>LMICs</b> | Low and Middle Income Countries                  |
| 372 | <b>SDGs</b>  | Sustainable Development Goals                    |
| 373 | <b>SHI</b>   | Social Health Insurance                          |
| 374 | <b>SNNPR</b> | South Nation's, Nationalities and Peoples Region |
| 375 | <b>SPSS</b>  | Statistical Package for Social Sciences          |
| 376 | <b>OOPs</b>  | Out-Of-Pocket Payments                           |
| 377 | <b>UHC</b>   | Universal Health Coverage                        |

378

379

380 ***Authors' contributions***

381 **Conceptualization:** Silas Bukuno Bujitie

382 **Data curation:** Silas Bukuno Bujitie, Yusuf Haji Daud

383 **Formal analysis:** Silas Bukuno Bujitie, Yusuf Haji Daud

384 **Funding acquisition:** Silas Bukuno Bujitie, Yusuf Haji Daud

385 **Investigation:** Silas Bukuno Bujitie, Yusuf Haji Daud.

386 **Methodology:** Silas Bukuno Bujitie, Yusuf Haji Daud

387 **Project administration:** Silas Bukuno Bujitie

388 **Software:** Silas Bukuno Bujitie, Yusuf Haji Daud

389 **Supervision:** Yusuf Haji Daud

390 **Validation:** Silas Bukuno Bujitie, Yusuf Haji Daud

391 **Visualization:** Silas Bukuno Bujitie, Yusuf Haji Daud

392 **Writing – original draft:** Silas Bukuno Bujitie

393 **Writing – review & editing:** Silas Bukuno Bujitie, Yusuf Haji Daud

394

395 **Funding:** There is no funding to report.

396 **Disclosure:** The authors report no conflicts of interest in this work.

397

398

399

400

401

402

403

404

## 405 *References*

- 406 1. Dror M, R.R., Koren R: , Willingness to pay for health insurance among rural and poor  
407 persons: Field evidence from seven micro health insurance units in India. *Health Policy*  
408 2007, 82:12-27. <https://doi.org/10.1016/j.healthpol.2006.07.011>
- 409 2. W., W., Primary health care on the road to universal health coverage: 2019 global  
410 monitoring report. 2021. <https://doi.org/10.1596/36724>
- 411 3. W., W., Delivering quality health services: A global imperative: OECD Publishing; 2018.  
412 <https://doi.org/10.1596/978-92-4-151390-6>
- 413 4. W., W., Tracking universal health coverage: 2017 global monitoring report: executive  
414 summary. WHO; 2017. <https://doi.org/10.1596/978-92-4-151355-5>
- 415 5. De Allegri M PS, B.H., Dong H, Mansmann U, Kouyaté B, et al. , Step-wedge cluster-  
416 randomised community-based trials: an application to the study of the impact of  
417 community health insurance. *Health Research Policy and Systems*. 2008;6(1):1-8.  
418 <https://doi.org/10.1186/1478-4505-6-10>
- 419 6. Macha J KA, M.S., Mtei G, Borghi J Determinants of community health fund  
420 membership in Tanzania: a mixed methods analysis. *BMC health services research*.  
421 2014;14(1):1-11. <https://doi.org/10.1186/s12913-014-0538-9>
- 422 7. J., J., Do community-based health insurance schemes improve poor people's access to  
423 health care? Evidence from rural Senegal. *World development*. 2004;32(2):273-88.  
424 <https://doi.org/10.1016/j.worlddev.2003.10.001>
- 425 8. Carrin G WM, C.B., Community-based health insurance in developing countries: a study  
426 of its contribution to the performance of health financing systems. *Tropical medicine &*  
427 *international health*. 2005;10(8):799-811.  
428 <https://doi.org/10.1111/j.1365-3156.2005.01455.x>

- 429 9. Soors W DN, D.V., Criel B, Community health insurance and universal coverage:  
430 multiple paths, many rivers to cross. 2010.  
431 [https://www.researchgate.net/publication/234072109\\_Community\\_Health\\_Insurance\\_An](https://www.researchgate.net/publication/234072109_Community_Health_Insurance_An)  
432 [d\\_Universal\\_Coverage\\_Multiple\\_Paths\\_Many\\_Rivers\\_To\\_Cross](https://www.researchgate.net/publication/234072109_Community_Health_Insurance_An) (accessed on may  
433 24,2023).
- 434 10. W, W., Health systems financing: the path to universal coverage World health report in,  
435 Vol. Geneva: WHO, 2010.; 2010. <https://doi.org/10.2471/blt.10.078741>
- 436 11. PN, W.H., Community-based health insurance: An evolutionary approach to achieving  
437 universal coverage in low-income countries. Journal of life sciences. 2012;6(3):321-30.  
438 [https://www.semanticscholar.org/paper/Community-Based-Health-Insurance%3A-An-](https://www.semanticscholar.org/paper/Community-Based-Health-Insurance%3A-An-Evolutionary-Wang-Pielemeier/5d158091d99bbace83a0a5b4aefd78b1f485367b)  
439 [Evolutionary-Wang-Pielemeier/5d158091d99bbace83a0a5b4aefd78b1f485367b](https://www.semanticscholar.org/paper/Community-Based-Health-Insurance%3A-An-Evolutionary-Wang-Pielemeier/5d158091d99bbace83a0a5b4aefd78b1f485367b)  
440 (accessed on may 24,2023).
- 441 12. WHO, United Nations. General Assembly. Seventy-fourth sessions. Agenda item 126.  
442 Resolution adopted by the General Assembly on 10 October 2019. Political Declaration  
443 of the high-level meeting on universal health coverage. 2019. Contract No.: A/RES/74/2.  
444 2019. <https://doi.org/10.18356/9789210055352>
- 445 13. XK, L.A., Coping with out-of-pocket health payments: empirical evidence from 15  
446 African countries. Bulletin of the World Health Organization. 2008;86(11):849-56C.  
447 <https://doi.org/10.2471/blt.07.049403>
- 448 14. K, J., Health financing for universal coverage and health system performance: concepts  
449 and implications for policy. Bulletin of the World Health Organization. 2013;91:602-11.  
450 <https://doi.org/10.2471/blt.12.113985>
- 451 15. PS, M.J., Access to health care: the role of a community based health insurance in Kenya.  
452 Pan Afr Med J. 2012;12:35. Epub 2012 Jun 19. PMID: 22891093; PMCID:  
453 PMC3415056. <https://pubmed.ncbi.nlm.nih.gov/22891093/>.



- 454 16. EHIA, Evaluation of community based health insurance pilot schemes in Ethiopia: final  
455 report in, Vol. Addis Ababa, Ethiopia: Ethiopian health insurance agency, 2015.; 2015.  
456 <https://www.hfgproject.org/evaluation-cbhi-pilots-ethiopia-final-report/> (accessed on may  
457 24,2023).
- 458 17. Chol C NJ, G.-B.A., Gebrehiwot TG, Debru B, Chimpolo M, et al., Health system  
459 reforms in five sub-Saharan African countries that experienced major armed conflicts  
460 (wars) during 1990–2015: a literature review. *Global health action*. 2018;11(1):1517931.  
461 <https://doi.org/10.1080/16549716.2018.1517931>
- 462 18. Z, H., Ethiopia health care financing reform brief: Improving quality and equity, March  
463 2012. [https://www.hfgproject.org/wp-](https://www.hfgproject.org/wp-content/uploads/2015/02/Ethiopia_Health_Care_Reform_Brief1.pdf)  
464 [content/uploads/2015/02/Ethiopia\\_Health\\_Care\\_Reform\\_Brief1.pdf](https://www.hfgproject.org/wp-content/uploads/2015/02/Ethiopia_Health_Care_Reform_Brief1.pdf) (accessed on may  
465 24,2023).
- 466 19. MOH, Ethiopia Health Sector Transformation Plan II (2015/16–2019/20), Oct 01,2015  
467 [https://www.cmpethiopia.org/content/download/2268/9612/file/HSTP%20Final%202015-10-](https://www.cmpethiopia.org/content/download/2268/9612/file/HSTP%20Final%202015-10-19.pdf)  
468 [19.pdf](https://www.cmpethiopia.org/content/download/2268/9612/file/HSTP%20Final%202015-10-19.pdf) (accessed on may 24,2023).
- 469 20. Binnendijk E DD, G.E., Koren R. , Estimating Willingness-to-Pay for health insurance  
470 among rural poor in India by reference to Engel's law. *Social science & medicine*.  
471 2013;76:67-73. <https://doi.org/10.1016/j.socscimed.2012.10.006>
- 472 21. Fadlallah R E-JF, H.N., Morsi RZ, Abou Samra CA, Ahmad A, et al. , Barriers and  
473 facilitators to implementation, uptake and sustainability of community-based health  
474 insurance schemes in low-and middle-income countries: a systematic review.  
475 *International journal for equity in health*. 2018;17(1):1-18.  
476 <https://doi.org/10.1186/s12939-018-0721-4>
- 477 22. EHIA., Evaluation of community based health insurance pilot schemes in Ethiopia: final  
478 report in, Vol. Addis Ababa, Ethiopia: Ethiopian health insurance agency, 2015.; 2015.

- 479 <https://www.hfgproject.org/evaluation-cbhi-pilots-ethiopia-final-report/> (accessed on may  
480 24,2023).
- 481 23. MOH., Ethiopia Health Sector Transformation Plan IV (2010/11 –2014/15), October  
482 2010. [https://www.healthynewbornnetwork.org/hnn-content/uploads/HSDP-IV-Final-](https://www.healthynewbornnetwork.org/hnn-content/uploads/HSDP-IV-Final-Draft-October-2010-2.pdf)  
483 [Draft-October-2010-2.pdf](https://www.healthynewbornnetwork.org/hnn-content/uploads/HSDP-IV-Final-Draft-October-2010-2.pdf) (accessed on may 24,2023).
- 484 24. EHIA., CBHI members' registration and contribution 2011-2020.CBHI trend bulletin.  
485 September 2020.  
486 [https://ehiagov.com/sites/default/files//Resources/CBHI%20Trend%202011%20to%2020](https://ehiagov.com/sites/default/files//Resources/CBHI%20Trend%202011%20to%202020.pdf)  
487 [20.pdf](https://ehiagov.com/sites/default/files//Resources/CBHI%20Trend%202011%20to%202020.pdf) (accessed on may 24,2023).
- 488 25. AZDHO., Annual CBHI performance report of Arba Minch Zuria District. June 2022.
- 489 26. Kusi A EU, H.K., Asante FA., Refusal to enrol in Ghana's National Health Insurance  
490 Scheme: is affordability the problem? International journal for equity in health.  
491 2015;14(1):1-14. <https://doi.org/10.1186/s12939-014-0130-2>
- 492 27. Wipf J GD, G.C., Purata RB, Julio A, Herbas C, et al. , Performance indicators for  
493 microinsurance–A handbook for microinsurance practitioners. April 2008.  
494 [https://www.findevgateway.org/sites/default/files/publications/files/mfg-en-toolkit-](https://www.findevgateway.org/sites/default/files/publications/files/mfg-en-toolkit-performance-indicators-for-microinsurance-a-handbook-for-microinsurance-practitioners-apr-2008.pdf)  
495 [performance-indicators-for-microinsurance-a-handbook-for-microinsurance-practitioners-](https://www.findevgateway.org/sites/default/files/publications/files/mfg-en-toolkit-performance-indicators-for-microinsurance-a-handbook-for-microinsurance-practitioners-apr-2008.pdf)  
496 [apr-2008.pdf](https://www.findevgateway.org/sites/default/files/publications/files/mfg-en-toolkit-performance-indicators-for-microinsurance-a-handbook-for-microinsurance-practitioners-apr-2008.pdf) (accessed on may 24,2023).
- 497 28. EG., C.M., Determinants of enrollment in community based health insurance among  
498 Households in Tach-Armachiho Woreda, North Gondar, Ethiopia, 2019. PloS one.  
499 2020;15(8):e0236027. <https://doi.org/10.1371/journal.pone.0236027>
- 500 29. CSA., Ethiopia Demographic and Health Survey 2016. Addis Ababa, Ethiopia, and  
501 Rockville, Maryland, USA: CSA and ICF. 551. 2016  
502 <https://dhsprogram.com/pubs/pdf/FR328/FR328.pdf>.

- 503 30. Tadesse G AD, K.A., Alemu Y. , Determinants of enrollment decision in the  
504 community-based health insurance, North West Ethiopia: a case-control study.  
505 Globalization and health. 2020 Dec;16(1):1-9. <https://doi.org/10.1186/s12992-019-0535-1>
- 506 31. Onwujekwe O OE, O.C., Uzochukwu B, Kirigia J, Petu A. , Willingness to pay for  
507 community-based health insurance in Nigeria: do economic status and place of residence  
508 matter? Health policy and planning. 2010;25(2):155-61.  
509 <https://doi.org/10.1093/heapol/czp046>
- 510 32. Byington CL, A.K., Stockmann C, Adler FR, Herbener A, Miller T, et al., Community  
511 surveillance of respiratory viruses among families in the Utah Better Identification of  
512 Germs-Longitudinal Viral Epidemiology (BIG-LoVE) study. Clinical Infectious Diseases  
513 2015. [https://doi.org/10.1093/cid/civ486.61\(8\):1217-24](https://doi.org/10.1093/cid/civ486.61(8):1217-24).
- 514 33. Rahman MM GS, S.E., Sultana P, Shibuya K. , Health-related financial catastrophe,  
515 inequality and chronic illness in Bangladesh. PloS one. 2013 Feb 25;8(2):e56873.  
516 <https://doi.org/10.1371/journal.pone.0056873>
- 517 34. K., Z., Smaller families aid economic growth, says UN report. BMJ. 2002 Dec  
518 7;325(7376):1318. <https://doi.org/10.1136/bmj.325.7376.1318/a>
- 519 35. Dong H KB, C.J., Sauerborn R. , Differential willingness of household heads to pay  
520 community-based health insurance premia for themselves and other household members.  
521 Health Policy and Planning. 2004;19(2):120-6. <https://doi.org/10.1093/heapol/czh014>
- 522 36. Dong H DAM, G.D., Souares A, Sauerborn R., Drop-out analysis of community-based  
523 health insurance membership at Nouna, Burkina Faso. Health policy. 2009;92(2-3):174-9.  
524 <https://doi.org/10.1016/j.healthpol.2009.03.013>
- 525 37. Adebayo EF UO, W.C., Stern EA, Lamont KT, Ataguba JE., A systematic review of  
526 factors that affect uptake of community-based health insurance in low-income and

- 527 middle-income countries. BMC health services research. 2015;15(1):1-13.  
528 <https://doi.org/10.1186/s12913-015-1179-3>
- 529 38. Haile M OS, M.B., Willingness to join community-based health insurance among rural  
530 households of Debub Bench District, Bench Maji Zone, Southwest Ethiopia. BMC Public  
531 Health. 2014;14(1):1-10. <https://doi.org/10.1186/1471-2458-14-591>
- 532 39. De Allegri M KB, B.H., Gbangou A, Pokhrel S, Sanon M, et al., Understanding  
533 enrolment in community health insurance in sub-Saharan Africa: a population-based case-  
534 control study in rural Burkina Faso. Bulletin of the World Health Organization.  
535 2006;84:852-8. <https://doi.org/10.2471/blt.06.031336>
- 536 40. A., J., Community Health Insurance Scheme as a viable option for rural population in  
537 Nigeria. Paper submitted to the Centre for the study of African Economies (CSAE),  
538 Department of Economics, University of Oxford. 2008.  
539 <http://catalog.ihnsn.org/citations/60512>
- 540 41. Basaza R CB, V.d.S.P., Community health insurance in Uganda: why does enrolment  
541 remain low? A view from beneath. Health policy. 2008;87(2):172-84.  
542 <https://doi.org/10.1016/j.healthpol.2007.12.008>
- 543 42. Zepre K YF, T.B., Tolossa O, Hailemariam D, Wondimu A, GebreEyesus FA, Tsehay T,  
544 Assfa K. , Factors influencing drop-out of households from community based health  
545 insurance membership in rural districts of Gurage Zone, Southern Ethiopia: Community  
546 based case-control study. Frontiers in Public Health. 2022;10.  
547 <https://doi.org/10.3389/fpubh.2022.925309>
- 548 43. Wassie GT TG, N.G., Melese AA, Ayalew AF, Bantie GM. , Determinants of household  
549 dropout from community-based health insurance program in northwest Ethiopia; A  
550 community-based case-control study. Plos one. 2023 Jan 11;18(1):e0276676.  
551 <https://doi.org/10.1371/journal.pone.0276676>

- 552 44. Fite MB RK, M.B., Tefera BN, Beha GA, Gurmessa TT. , Factors associated with  
553 enrollment for community-based health insurance scheme in Western Ethiopia: Case-  
554 control study. Plos one. 2021;16(6):e0252303.  
555 <https://doi.org/10.1371/journal.pone.0252303>
- 556 45. Sarker AR SM, A.S., Mahumud RA, Morton A, Khan JA. , Clients' experience and  
557 satisfaction of utilizing healthcare services in a community based health insurance  
558 program in Bangladesh. International journal of environmental research and public health.  
559 2018;15(8):1637. <https://doi.org/10.3390/ijerph15081637>
- 560 46. Panda P CA, D.D., Building awareness to health insurance among the target population of  
561 community-based health insurance schemes in rural India. Tropical Medicine &  
562 International Health. 2015;20(8):1093-107. <https://doi.org/10.1111/tmi.12524>
- 563
- 564

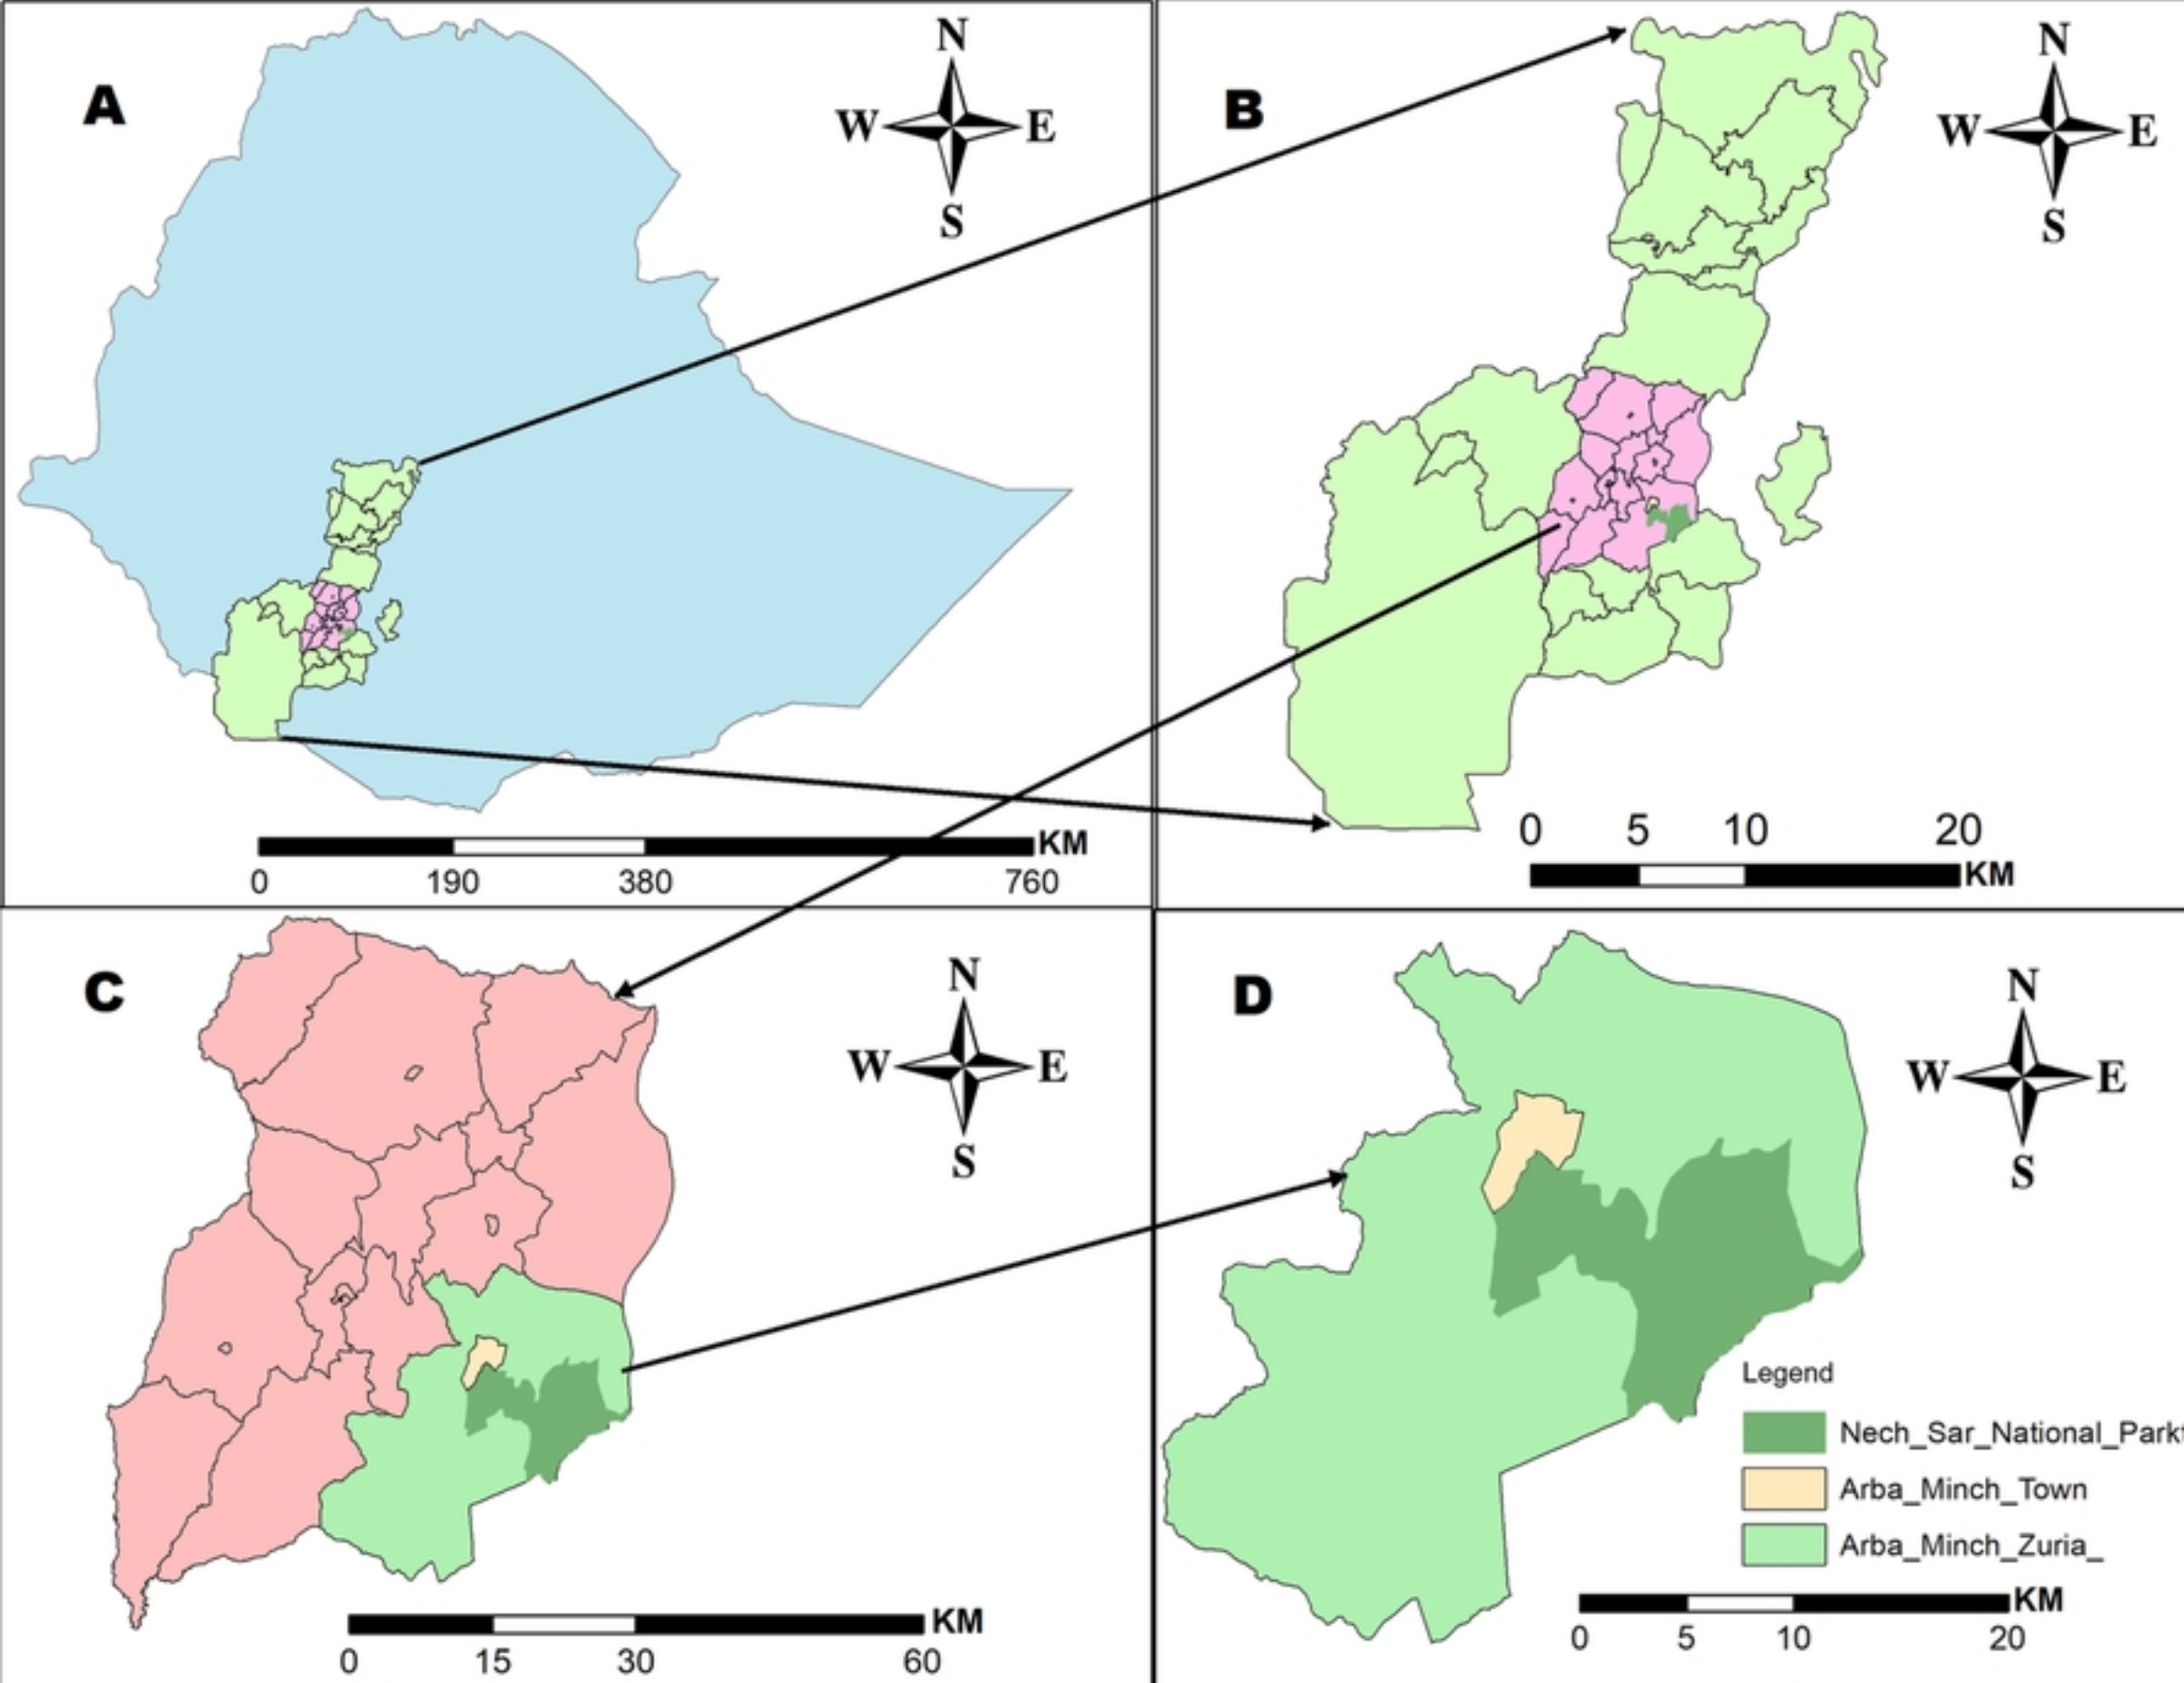

Figure

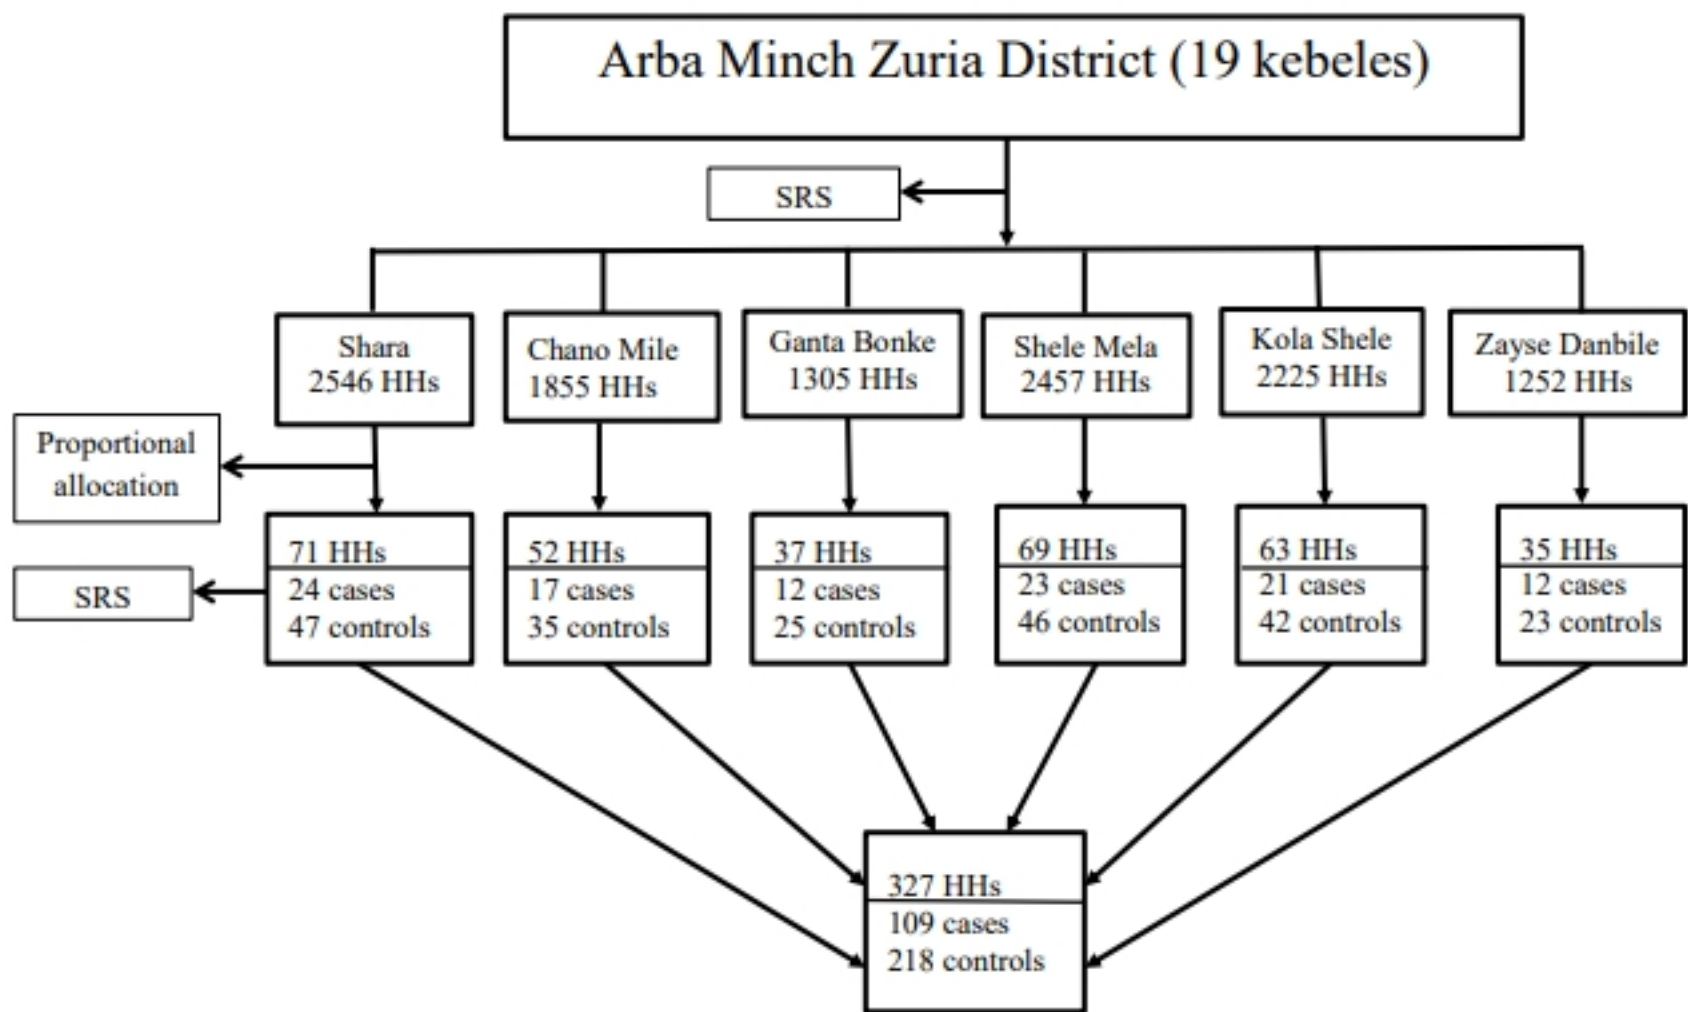

Figure
